# Supplementary material
Source: PubMed Central journal article supplement (PMC3493253)
Supplement: NIHMS413945-supplement-239_2012_9520_MOESM2_ESM.pdf [file NIHMS413945-supplement-239_2012_9520_MOESM2_ESM.pdf]

**Table S1** Genetic data for study isolates

| DAR number | Species          | ST   | <i>arcC</i> | <i>aroE</i> | <i>gtr/glp</i> | <i>mut/gmk</i> | <i>pyr/pta</i> | <i>tpi</i> | <i>yqiL</i> | ACME<br>( <i>arcA,arcC</i> ) |
|------------|------------------|------|-------------|-------------|----------------|----------------|----------------|------------|-------------|------------------------------|
| 948        | <i>S. aureus</i> | 5    | 1           | 4           | 1              | 4              | 12             | 1          | 10          | -                            |
| 951        | <i>S. aureus</i> | 105  | 1           | 4           | 1              | 4              | 12             | 1          | 28          | -                            |
| 952        | <i>S. aureus</i> | 1181 | 3           | 3           | 1              | 1              | 139            | 4          | 3           | -                            |
| 953        | <i>S. aureus</i> | 45   | 10          | 14          | 8              | 6              | 10             | 3          | 2           | -                            |
| 966        | <i>S. aureus</i> | 105  | 1           | 4           | 1              | 4              | 12             | 1          | 28          | -                            |
| 1065       | <i>S. aureus</i> | 5    | 1           | 4           | 1              | 4              | 12             | 1          | 10          | -                            |
| 1067       | <i>S. aureus</i> | 105  | 1           | 4           | 1              | 4              | 12             | 1          | 28          | -                            |
| 1070       | <i>S. aureus</i> | 22   | 7           | 6           | 1              | 5              | 8              | 8          | 6           | -                            |
| 1081       | <i>S. aureus</i> | 1182 | 147         | 27          | 1              | 1              | 1              | 1          | 10          | -                            |
| 1082       | <i>S. aureus</i> | 5    | 1           | 4           | 1              | 4              | 12             | 1          | 10          | -                            |
| 1083       | <i>S. aureus</i> | 231  | 1           | 34          | 1              | 4              | 12             | 1          | 28          | -                            |
| 1084       | <i>S. aureus</i> | 105  | 1           | 4           | 1              | 4              | 12             | 1          | 28          | -                            |
| 1085       | <i>S. aureus</i> | 8    | 3           | 3           | 1              | 1              | 4              | 4          | 3           | -                            |
| 1086       | <i>S. aureus</i> | 105  | 1           | 4           | 1              | 4              | 12             | 1          | 28          | -                            |
| 1087       | <i>S. aureus</i> | 36   | 2           | 2           | 2              | 2              | 3              | 3          | 2           | -                            |
| 1088       | <i>S. aureus</i> | 59   | 19          | 23          | 15             | 2              | 19             | 20         | 15          | -                            |
| 1090       | <i>S. aureus</i> | 5    | 1           | 4           | 1              | 4              | 12             | 1          | 10          | -                            |
| 1154       | <i>S. aureus</i> | 1150 | 3           | 3           | 1              | 1              | 33             | 4          | 3           | -                            |
| 1157       | <i>S. aureus</i> | 5    | 1           | 4           | 1              | 4              | 12             | 1          | 10          | -                            |
| 1158       | <i>S. aureus</i> | 5    | 1           | 4           | 1              | 4              | 12             | 1          | 10          | -                            |
| 1159       | <i>S. aureus</i> | 12   | 1           | 3           | 1              | 8              | 11             | 5          | 11          | -                            |
| 1160       | <i>S. aureus</i> | 8    | 3           | 3           | 1              | 1              | 4              | 4          | 3           | -                            |
| 1161       | <i>S. aureus</i> | 5    | 1           | 4           | 1              | 4              | 12             | 1          | 10          | -                            |
| 1162       | <i>S. aureus</i> | 508  | 10          | 40          | 8              | 6              | 10             | 3          | 2           | -                            |
| 1174       | <i>S. aureus</i> | 105  | 1           | 4           | 1              | 4              | 12             | 1          | 28          | -                            |
| 1176       | <i>S. aureus</i> | 496  | 63          | 4           | 1              | 4              | 12             | 1          | 28          | -                            |
| 1178       | <i>S. aureus</i> | 8    | 3           | 3           | 1              | 1              | 4              | 4          | 3           | -                            |
| 1182       | <i>S. aureus</i> | 1    | 1           | 1           | 1              | 1              | 1              | 1          | 1           | -                            |
| 1183       | <i>S. aureus</i> | 5    | 1           | 4           | 1              | 4              | 12             | 1          | 10          | -                            |
| 1199       | <i>S. aureus</i> | 5    | 1           | 4           | 1              | 4              | 12             | 1          | 10          | -                            |
| 1200       | <i>S. aureus</i> | 105  | 1           | 4           | 1              | 4              | 12             | 1          | 28          | -                            |
| 1203       | <i>S. aureus</i> | 1    | 1           | 1           | 1              | 1              | 1              | 1          | 1           | -                            |
| 1274       | <i>S. aureus</i> | 8    | 3           | 3           | 1              | 1              | 4              | 4          | 3           | +                            |
| 1275       | <i>S. aureus</i> | 5    | 1           | 4           | 1              | 4              | 12             | 1          | 10          | -                            |
| 1276       | <i>S. aureus</i> | 105  | 1           | 4           | 1              | 4              | 12             | 1          | 28          | -                            |
| 1277       | <i>S. aureus</i> | 8    | 3           | 3           | 1              | 1              | 4              | 4          | 3           | +                            |
| 1278       | <i>S. aureus</i> | 5    | 1           | 4           | 1              | 4              | 12             | 1          | 10          | -                            |
| 1280       | <i>S. aureus</i> | 105  | 1           | 4           | 1              | 4              | 12             | 1          | 28          | -                            |
| 1283       | <i>S. aureus</i> | 1183 | 3           | 183         | 1              | 1              | 4              | 1          | 3           | +                            |
| 1285       | <i>S. aureus</i> | 1049 | 8           | 2           | 2              | 2              | 6              | 126        | 2           | -                            |
| 1291       | <i>S. aureus</i> | 496  | 63          | 4           | 1              | 4              | 12             | 1          | 28          | -                            |
| 1293       | <i>S. aureus</i> | 5    | 1           | 4           | 1              | 4              | 12             | 1          | 10          | -                            |
| 1295       | <i>S. aureus</i> | 1184 | 1           | 4           | 1              | 4              | 140            | 1          | 10          | -                            |
| 1296       | <i>S. aureus</i> | 30   | 2           | 2           | 2              | 2              | 6              | 3          | 2           | -                            |
| 1299       | <i>S. aureus</i> | 15   | 13          | 13          | 1              | 1              | 12             | 11         | 13          | -                            |
| 1304       | <i>S. aureus</i> | 8    | 3           | 3           | 1              | 1              | 4              | 4          | 3           | -                            |
| 1310       | <i>S. aureus</i> | 231  | 1           | 34          | 1              | 4              | 12             | 1          | 28          | -                            |
| 1311       | <i>S. aureus</i> | 5    | 1           | 4           | 1              | 4              | 12             | 1          | 10          | -                            |
| 1313       | <i>S. aureus</i> | 105  | 1           | 4           | 1              | 4              | 12             | 1          | 28          | -                            |
| 1366       | <i>S. aureus</i> | 105  | 1           | 4           | 1              | 4              | 12             | 1          | 28          | -                            |
| 1368       | <i>S. aureus</i> | 8    | 3           | 3           | 1              | 1              | 4              | 4          | 3           | +                            |
| 1369       | <i>S. aureus</i> | 5    | 1           | 4           | 1              | 4              | 12             | 1          | 10          | -                            |
| 1370       | <i>S. aureus</i> | 5    | 1           | 4           | 1              | 4              | 12             | 1          | 10          | -                            |
| 1481       | <i>S. aureus</i> | 45   | 10          | 14          | 8              | 6              | 10             | 3          | 2           | -                            |
| 1482       | <i>S. aureus</i> | 123  | 6           | 5           | 6              | 2              | 7              | 17         | 19          | -                            |
| 1490       | <i>S. aureus</i> | 105  | 1           | 4           | 1              | 4              | 12             | 1          | 28          | -                            |

|      |                  |      |     |    |    |   |    |    |    |   |
|------|------------------|------|-----|----|----|---|----|----|----|---|
| 1492 | <i>S. aureus</i> | 105  | 1   | 4  | 1  | 4 | 12 | 1  | 28 | - |
| 1495 | <i>S. aureus</i> | 15   | 13  | 13 | 1  | 1 | 12 | 11 | 13 | - |
| 1499 | <i>S. aureus</i> | 30   | 2   | 2  | 2  | 2 | 6  | 3  | 2  | - |
| 1500 | <i>S. aureus</i> | 45   | 10  | 14 | 8  | 6 | 10 | 3  | 2  | - |
| 1501 | <i>S. aureus</i> | 8    | 3   | 3  | 1  | 1 | 4  | 4  | 3  | + |
| 1502 | <i>S. aureus</i> | 8    | 3   | 3  | 1  | 1 | 4  | 4  | 3  | + |
| 1503 | <i>S. aureus</i> | 231  | 1   | 34 | 1  | 4 | 12 | 1  | 28 | + |
| 1507 | <i>S. aureus</i> | 105  | 1   | 4  | 1  | 4 | 12 | 1  | 28 | - |
| 1692 | <i>S. aureus</i> | 105  | 1   | 4  | 1  | 4 | 12 | 1  | 28 | - |
| 1698 | <i>S. aureus</i> | 5    | 1   | 4  | 1  | 4 | 12 | 1  | 10 | - |
| 1800 | <i>S. aureus</i> | 105  | 1   | 4  | 1  | 4 | 12 | 1  | 28 | - |
| 1809 | <i>S. aureus</i> | 8    | 3   | 3  | 1  | 1 | 4  | 4  | 3  | + |
| 1810 | <i>S. aureus</i> | 231  | 1   | 34 | 1  | 4 | 12 | 1  | 28 | - |
| 1811 | <i>S. aureus</i> | 105  | 1   | 4  | 1  | 4 | 12 | 1  | 28 | - |
| 1813 | <i>S. aureus</i> | 5    | 1   | 4  | 1  | 4 | 12 | 1  | 10 | - |
| 1814 | <i>S. aureus</i> | 5    | 1   | 4  | 1  | 4 | 12 | 1  | 10 | - |
| 1815 | <i>S. aureus</i> | 496  | 63  | 4  | 1  | 4 | 12 | 1  | 28 | - |
| 1816 | <i>S. aureus</i> | 15   | 13  | 13 | 1  | 1 | 12 | 11 | 13 | - |
| 1817 | <i>S. aureus</i> | 72   | 1   | 4  | 1  | 8 | 4  | 4  | 3  | - |
| 1838 | <i>S. aureus</i> | 72   | 1   | 4  | 1  | 8 | 4  | 4  | 3  | - |
| 1841 | <i>S. aureus</i> | 45   | 10  | 14 | 8  | 6 | 10 | 3  | 2  | - |
| 1842 | <i>S. aureus</i> | 5    | 1   | 4  | 1  | 4 | 12 | 1  | 10 | - |
| 1843 | <i>S. aureus</i> | 1185 | 148 | 13 | 1  | 1 | 12 | 11 | 13 | - |
| 1846 | <i>S. aureus</i> | 59   | 19  | 23 | 15 | 2 | 19 | 20 | 15 | - |
| 1849 | <i>S. aureus</i> | 15   | 13  | 13 | 1  | 1 | 12 | 11 | 13 | - |
| 1852 | <i>S. aureus</i> | 15   | 13  | 13 | 1  | 1 | 12 | 11 | 13 | - |
| 1858 | <i>S. aureus</i> | 8    | 3   | 3  | 1  | 1 | 4  | 4  | 3  | - |
| 1859 | <i>S. aureus</i> | 105  | 1   | 4  | 1  | 4 | 12 | 1  | 28 | - |
| 1862 | <i>S. aureus</i> | 105  | 1   | 4  | 1  | 4 | 12 | 1  | 28 | - |
| 1863 | <i>S. aureus</i> | 15   | 13  | 13 | 1  | 1 | 12 | 11 | 13 | - |
| 1868 | <i>S. aureus</i> | 12   | 1   | 3  | 1  | 8 | 11 | 5  | 11 | - |
| 1870 | <i>S. aureus</i> | 15   | 13  | 13 | 1  | 1 | 12 | 11 | 13 | - |
| 1871 | <i>S. aureus</i> | 30   | 2   | 2  | 2  | 2 | 6  | 3  | 2  | - |
| 1874 | <i>S. aureus</i> | 5    | 1   | 4  | 1  | 4 | 12 | 1  | 10 | - |
| 1876 | <i>S. aureus</i> | 8    | 3   | 3  | 1  | 1 | 4  | 4  | 3  | + |
| 1877 | <i>S. aureus</i> | 8    | 3   | 3  | 1  | 1 | 4  | 4  | 3  | + |
| 1883 | <i>S. aureus</i> | 5    | 1   | 4  | 1  | 4 | 12 | 1  | 10 | - |
| 1885 | <i>S. aureus</i> | 5    | 1   | 4  | 1  | 4 | 12 | 1  | 10 | - |
| 1890 | <i>S. aureus</i> | 5    | 1   | 4  | 1  | 4 | 12 | 1  | 10 | - |
| 1926 | <i>S. aureus</i> | 225  | 1   | 4  | 1  | 4 | 12 | 25 | 10 | - |
| 1936 | <i>S. aureus</i> | 105  | 1   | 4  | 1  | 4 | 12 | 1  | 28 | - |
| 1937 | <i>S. aureus</i> | 105  | 1   | 4  | 1  | 4 | 12 | 1  | 28 | - |
| 1938 | <i>S. aureus</i> | 5    | 1   | 4  | 1  | 4 | 12 | 1  | 10 | - |
| 1939 | <i>S. aureus</i> | 105  | 1   | 4  | 1  | 4 | 12 | 1  | 28 | - |
| 1940 | <i>S. aureus</i> | 15   | 13  | 13 | 1  | 1 | 12 | 11 | 13 | - |
| 1941 | <i>S. aureus</i> | 5    | 1   | 4  | 1  | 4 | 12 | 1  | 10 | - |
| 1942 | <i>S. aureus</i> | 5    | 1   | 4  | 1  | 4 | 12 | 1  | 10 | - |
| 1943 | <i>S. aureus</i> | 15   | 13  | 13 | 1  | 1 | 12 | 11 | 13 | - |
| 1945 | <i>S. aureus</i> | 15   | 13  | 13 | 1  | 1 | 12 | 11 | 13 | - |
| 1953 | <i>S. aureus</i> | 398  | 3   | 35 | 19 | 2 | 20 | 26 | 39 | - |
| 1954 | <i>S. aureus</i> | 231  | 1   | 34 | 1  | 4 | 12 | 1  | 28 | - |
| 1955 | <i>S. aureus</i> | 105  | 1   | 4  | 1  | 4 | 12 | 1  | 28 | + |
| 1956 | <i>S. aureus</i> | 105  | 1   | 4  | 1  | 4 | 12 | 1  | 28 | - |
| 1961 | <i>S. aureus</i> | 231  | 1   | 34 | 1  | 4 | 12 | 1  | 28 | - |
| 1964 | <i>S. aureus</i> | 8    | 3   | 3  | 1  | 1 | 4  | 4  | 3  | + |
| 1980 | <i>S. aureus</i> | 105  | 1   | 4  | 1  | 4 | 12 | 1  | 28 | - |
| 1981 | <i>S. aureus</i> | 8    | 3   | 3  | 1  | 1 | 4  | 4  | 3  | + |
| 1995 | <i>S. aureus</i> | 231  | 1   | 34 | 1  | 4 | 12 | 1  | 28 | - |
| 1996 | <i>S. aureus</i> | 8    | 3   | 3  | 1  | 1 | 4  | 4  | 3  | - |
| 1999 | <i>S. aureus</i> | 8    | 3   | 3  | 1  | 1 | 4  | 4  | 3  | + |

|      |                       |      |    |     |   |   |     |   |    |   |
|------|-----------------------|------|----|-----|---|---|-----|---|----|---|
| 2000 | <i>S. aureus</i>      | 5    | 1  | 4   | 1 | 4 | 12  | 1 | 10 | - |
| 2002 | <i>S. aureus</i>      | 1186 | 1  | 4   | 1 | 4 | 141 | 1 | 10 | - |
| 2004 | <i>S. aureus</i>      | 8    | 3  | 3   | 1 | 1 | 4   | 4 | 3  | - |
| 2016 | <i>S. aureus</i>      | 8    | 3  | 3   | 1 | 1 | 4   | 4 | 3  | + |
| 2017 | <i>S. aureus</i>      | 8    | 3  | 3   | 1 | 1 | 4   | 4 | 3  | + |
| 2018 | <i>S. aureus</i>      | 5    | 1  | 4   | 1 | 4 | 12  | 1 | 10 | - |
| 2019 | <i>S. aureus</i>      | 105  | 1  | 4   | 1 | 4 | 12  | 1 | 28 | - |
| 2025 | <i>S. aureus</i>      | 30   | 2  | 2   | 2 | 2 | 6   | 3 | 2  | - |
| 2026 | <i>S. aureus</i>      | 1187 | 1  | 184 | 1 | 4 | 12  | 1 | 28 | - |
| 2029 | <i>S. aureus</i>      | 8    | 3  | 3   | 1 | 1 | 4   | 4 | 3  | + |
| 2031 | <i>S. aureus</i>      | 8    | 3  | 3   | 1 | 1 | 4   | 4 | 3  | - |
| 2033 | <i>S. aureus</i>      | 8    | 3  | 3   | 1 | 1 | 4   | 4 | 3  | - |
| 2040 | <i>S. aureus</i>      | 1    | 1  | 1   | 1 | 1 | 1   | 1 | 1  | - |
| 2044 | <i>S. aureus</i>      | 1188 | 3  | 185 | 1 | 1 | 4   | 4 | 3  | - |
| 2065 | <i>S. aureus</i>      | 8    | 3  | 3   | 1 | 1 | 4   | 4 | 3  | + |
| 2067 | <i>S. aureus</i>      | 105  | 1  | 4   | 1 | 4 | 12  | 1 | 28 | - |
| 2068 | <i>S. aureus</i>      | 5    | 1  | 4   | 1 | 4 | 12  | 1 | 10 | - |
| 2070 | <i>S. aureus</i>      | 496  | 63 | 4   | 1 | 4 | 12  | 1 | 28 | - |
| 2072 | <i>S. aureus</i>      | 105  | 1  | 4   | 1 | 4 | 12  | 1 | 28 | - |
| 2075 | <i>S. aureus</i>      | 496  | 63 | 4   | 1 | 4 | 12  | 1 | 28 | - |
| 956  | <i>S. epidermidis</i> | 69   | 1  | 18  | 6 | 2 | 2   | 1 | 1  | - |
| 1030 | <i>S. epidermidis</i> | 5    | 1  | 1   | 1 | 2 | 2   | 1 | 1  | + |
| 1031 | <i>S. epidermidis</i> | 23   | 7  | 1   | 2 | 1 | 3   | 3 | 1  | - |
| 1073 | <i>S. epidermidis</i> | 2    | 7  | 1   | 2 | 2 | 4   | 1 | 1  | - |
| 1080 | <i>S. epidermidis</i> | 16   | 2  | 1   | 2 | 2 | 15  | 1 | 1  | + |
| 1094 | <i>S. epidermidis</i> | 83   | 1  | 2   | 1 | 2 | 1   | 1 | 10 | - |
| 1099 | <i>S. epidermidis</i> | 16   | 2  | 1   | 2 | 2 | 15  | 1 | 1  | - |
| 1100 | <i>S. epidermidis</i> | 83   | 1  | 2   | 1 | 2 | 1   | 1 | 10 | - |
| 1103 | <i>S. epidermidis</i> | 6    | 1  | 1   | 2 | 2 | 2   | 1 | 1  | + |
| 1104 | <i>S. epidermidis</i> | 2    | 7  | 1   | 2 | 2 | 4   | 1 | 1  | + |
| 1146 | <i>S. epidermidis</i> | 73   | 1  | 5   | 2 | 6 | 2   | 1 | 6  | - |
| 1148 | <i>S. epidermidis</i> | 57   | 1  | 1   | 1 | 1 | 2   | 1 | 1  | + |
| 1150 | <i>S. epidermidis</i> | 5    | 1  | 1   | 1 | 2 | 2   | 1 | 1  | - |
| 1152 | <i>S. epidermidis</i> | 16   | 2  | 1   | 2 | 2 | 15  | 1 | 1  | + |
| 1153 | <i>S. epidermidis</i> | 23   | 7  | 1   | 2 | 1 | 3   | 3 | 1  | - |
| 1165 | <i>S. epidermidis</i> | 22   | 7  | 1   | 2 | 2 | 4   | 7 | 1  | + |
| 1166 | <i>S. epidermidis</i> | 60   | 1  | 1   | 2 | 6 | 2   | 1 | 16 | - |
| 1170 | <i>S. epidermidis</i> | 20   | 1  | 1   | 2 | 2 | 1   | 1 | 3  | - |
| 1172 | <i>S. epidermidis</i> | 2    | 7  | 1   | 2 | 2 | 4   | 1 | 1  | + |
| 1173 | <i>S. epidermidis</i> | 5    | 1  | 1   | 1 | 2 | 2   | 1 | 1  | + |
| 1186 | <i>S. epidermidis</i> | 2    | 7  | 1   | 2 | 2 | 4   | 1 | 1  | - |
| 1187 | <i>S. epidermidis</i> | 16   | 2  | 1   | 2 | 2 | 15  | 1 | 1  | + |
| 1188 | <i>S. epidermidis</i> | 85   | 1  | 1   | 2 | 2 | 1   | 1 | 1  | + |
| 1202 | <i>S. epidermidis</i> | 2    | 7  | 1   | 2 | 2 | 4   | 1 | 1  | - |
| 1264 | <i>S. epidermidis</i> | 23   | 7  | 1   | 2 | 1 | 3   | 3 | 1  | - |
| 1267 | <i>S. epidermidis</i> | 2    | 7  | 1   | 2 | 2 | 4   | 1 | 1  | - |
| 1268 | <i>S. epidermidis</i> | 23   | 7  | 1   | 2 | 1 | 3   | 3 | 1  | - |
| 1272 | <i>S. epidermidis</i> | 5    | 1  | 1   | 1 | 2 | 2   | 1 | 1  | + |
| 1273 | <i>S. epidermidis</i> | 20   | 1  | 1   | 2 | 2 | 1   | 1 | 3  | - |
| 1288 | <i>S. epidermidis</i> | 5    | 1  | 1   | 1 | 2 | 2   | 1 | 1  | - |
| 1289 | <i>S. epidermidis</i> | 23   | 7  | 1   | 2 | 1 | 3   | 3 | 1  | - |
| 1301 | <i>S. epidermidis</i> | 2    | 7  | 1   | 2 | 2 | 4   | 1 | 1  | + |
| 1305 | <i>S. epidermidis</i> | 6    | 1  | 1   | 2 | 2 | 2   | 1 | 1  | + |
| 1317 | <i>S. epidermidis</i> | 5    | 1  | 1   | 1 | 2 | 2   | 1 | 1  | + |
| 1372 | <i>S. epidermidis</i> | 89   | 1  | 1   | 2 | 1 | 2   | 1 | 1  | - |
| 1373 | <i>S. epidermidis</i> | 5    | 1  | 1   | 1 | 2 | 2   | 1 | 1  | + |
| 1374 | <i>S. epidermidis</i> | 23   | 7  | 1   | 2 | 1 | 3   | 3 | 1  | - |
| 1487 | <i>S. epidermidis</i> | 83   | 1  | 2   | 1 | 2 | 1   | 1 | 10 | - |
| 1488 | <i>S. epidermidis</i> | 179  | 1  | 2   | 2 | 2 | 1   | 1 | 1  | + |
| 1504 | <i>S. epidermidis</i> | 2    | 7  | 1   | 2 | 2 | 4   | 1 | 1  | - |

|      |                       |     |    |    |    |    |    |    |    |   |
|------|-----------------------|-----|----|----|----|----|----|----|----|---|
| 1509 | <i>S. epidermidis</i> | 60  | 1  | 1  | 2  | 6  | 2  | 1  | 16 | - |
| 1510 | <i>S. epidermidis</i> | 16  | 2  | 1  | 2  | 2  | 15 | 1  | 1  | + |
| 1654 | <i>S. epidermidis</i> | 16  | 2  | 1  | 2  | 2  | 15 | 1  | 1  | + |
| 1656 | <i>S. epidermidis</i> | 2   | 7  | 1  | 2  | 2  | 4  | 1  | 1  | - |
| 1658 | <i>S. epidermidis</i> | 5   | 1  | 1  | 1  | 2  | 2  | 1  | 1  | + |
| 1665 | <i>S. epidermidis</i> | 16  | 2  | 1  | 2  | 2  | 15 | 1  | 1  | - |
| 1668 | <i>S. epidermidis</i> | 2   | 7  | 1  | 2  | 2  | 4  | 1  | 1  | - |
| 1675 | <i>S. epidermidis</i> | 153 | 2  | 1  | 6  | 2  | 2  | 1  | 1  | + |
| 1677 | <i>S. epidermidis</i> | 178 | 24 | 26 | 2  | 23 | 24 | 1  | 24 | + |
| 1679 | <i>S. epidermidis</i> | 5   | 1  | 1  | 1  | 2  | 2  | 1  | 1  | + |
| 1682 | <i>S. epidermidis</i> | 16  | 2  | 1  | 2  | 2  | 15 | 1  | 1  | - |
| 1683 | <i>S. epidermidis</i> | 177 | 1  | 1  | 1  | 24 | 2  | 1  | 1  | - |
| 1685 | <i>S. epidermidis</i> | 16  | 2  | 1  | 2  | 2  | 15 | 1  | 1  | + |
| 1687 | <i>S. epidermidis</i> | 23  | 7  | 1  | 2  | 1  | 3  | 3  | 1  | - |
| 1690 | <i>S. epidermidis</i> | 23  | 7  | 1  | 2  | 1  | 3  | 3  | 1  | - |
| 1691 | <i>S. epidermidis</i> | 5   | 1  | 1  | 1  | 2  | 2  | 1  | 1  | - |
| 1802 | <i>S. epidermidis</i> | 5   | 1  | 1  | 1  | 2  | 2  | 1  | 1  | - |
| 1804 | <i>S. epidermidis</i> | 23  | 7  | 1  | 2  | 1  | 3  | 3  | 1  | - |
| 1819 | <i>S. epidermidis</i> | 69  | 1  | 18 | 6  | 2  | 2  | 1  | 1  | + |
| 1822 | <i>S. epidermidis</i> | 16  | 2  | 1  | 2  | 2  | 15 | 1  | 1  | + |
| 1823 | <i>S. epidermidis</i> | 5   | 1  | 1  | 1  | 2  | 2  | 1  | 1  | - |
| 1824 | <i>S. epidermidis</i> | 22  | 7  | 1  | 2  | 2  | 4  | 7  | 1  | + |
| 1827 | <i>S. epidermidis</i> | 5   | 1  | 1  | 1  | 2  | 2  | 1  | 1  | - |
| 1832 | <i>S. epidermidis</i> | 23  | 7  | 1  | 2  | 1  | 3  | 3  | 1  | - |
| 1833 | <i>S. epidermidis</i> | 2   | 7  | 1  | 2  | 2  | 4  | 1  | 1  | - |
| 1835 | <i>S. epidermidis</i> | 23  | 7  | 1  | 2  | 1  | 3  | 3  | 1  | - |
| 1854 | <i>S. epidermidis</i> | 83  | 1  | 2  | 1  | 2  | 1  | 1  | 10 | - |
| 1856 | <i>S. epidermidis</i> | 23  | 7  | 1  | 2  | 1  | 3  | 3  | 1  | - |
| 1860 | <i>S. epidermidis</i> | 5   | 1  | 1  | 1  | 2  | 2  | 1  | 1  | + |
| 1861 | <i>S. epidermidis</i> | 23  | 7  | 1  | 2  | 1  | 3  | 3  | 1  | - |
| 1865 | <i>S. epidermidis</i> | 20  | 1  | 1  | 2  | 2  | 1  | 1  | 3  | - |
| 1888 | <i>S. epidermidis</i> | 2   | 7  | 1  | 2  | 2  | 4  | 1  | 1  | + |
| 1891 | <i>S. epidermidis</i> | 5   | 1  | 1  | 1  | 2  | 2  | 1  | 1  | - |
| 1892 | <i>S. epidermidis</i> | 73  | 1  | 5  | 2  | 6  | 2  | 1  | 6  | + |
| 1895 | <i>S. epidermidis</i> | 23  | 7  | 1  | 2  | 1  | 3  | 3  | 1  | - |
| 1896 | <i>S. epidermidis</i> | 5   | 1  | 1  | 1  | 2  | 2  | 1  | 1  | - |
| 1897 | <i>S. epidermidis</i> | 23  | 7  | 1  | 2  | 1  | 3  | 3  | 1  | - |
| 1900 | <i>S. epidermidis</i> | 23  | 7  | 1  | 2  | 1  | 3  | 3  | 1  | + |
| 1901 | <i>S. epidermidis</i> | 173 | 1  | 6  | 6  | 1  | 2  | 1  | 10 | + |
| 1905 | <i>S. epidermidis</i> | 2   | 7  | 1  | 2  | 2  | 4  | 1  | 1  | - |
| 1906 | <i>S. epidermidis</i> | 5   | 1  | 1  | 1  | 2  | 2  | 1  | 1  | - |
| 1907 | <i>S. epidermidis</i> | 2   | 7  | 1  | 2  | 2  | 4  | 1  | 1  | + |
| 1908 | <i>S. epidermidis</i> | 180 | 7  | 1  | 6  | 2  | 4  | 1  | 10 | + |
| 1910 | <i>S. epidermidis</i> | 69  | 1  | 18 | 6  | 2  | 2  | 1  | 1  | - |
| 1911 | <i>S. epidermidis</i> | 16  | 2  | 1  | 2  | 2  | 15 | 1  | 1  | + |
| 1913 | <i>S. epidermidis</i> | 5   | 1  | 1  | 1  | 2  | 2  | 1  | 1  | + |
| 1914 | <i>S. epidermidis</i> | 89  | 1  | 1  | 2  | 1  | 2  | 1  | 1  | - |
| 1918 | <i>S. epidermidis</i> | 173 | 1  | 6  | 6  | 1  | 2  | 1  | 10 | - |
| 1928 | <i>S. epidermidis</i> | 182 | 12 | 1  | 5  | 2  | 3  | 1  | 20 | - |
| 1929 | <i>S. epidermidis</i> | 5   | 1  | 1  | 1  | 2  | 2  | 1  | 1  | + |
| 1933 | <i>S. epidermidis</i> | 2   | 7  | 1  | 2  | 2  | 4  | 1  | 1  | - |
| 1935 | <i>S. epidermidis</i> | 83  | 1  | 2  | 1  | 2  | 1  | 1  | 10 | - |
| 1944 | <i>S. epidermidis</i> | 89  | 1  | 1  | 2  | 1  | 2  | 1  | 1  | - |
| 1946 | <i>S. epidermidis</i> | 2   | 7  | 1  | 2  | 2  | 4  | 1  | 1  | - |
| 1947 | <i>S. epidermidis</i> | 2   | 7  | 1  | 2  | 2  | 4  | 1  | 1  | + |
| 1950 | <i>S. epidermidis</i> | 69  | 1  | 18 | 6  | 2  | 2  | 1  | 1  | + |
| 1957 | <i>S. epidermidis</i> | 22  | 7  | 1  | 2  | 2  | 4  | 7  | 1  | + |
| 1960 | <i>S. epidermidis</i> | 7   | 1  | 1  | 1  | 2  | 4  | 1  | 1  | + |
| 1965 | <i>S. epidermidis</i> | 183 | 8  | 19 | 17 | 4  | 9  | 10 | 2  | - |
| 1966 | <i>S. epidermidis</i> | 5   | 1  | 1  | 1  | 2  | 2  | 1  | 1  | - |

|      |                       |     |    |    |    |   |    |   |    |   |
|------|-----------------------|-----|----|----|----|---|----|---|----|---|
| 1967 | <i>S. epidermidis</i> | 2   | 7  | 1  | 2  | 2 | 4  | 1 | 1  | + |
| 1975 | <i>S. epidermidis</i> | 5   | 1  | 1  | 1  | 2 | 2  | 1 | 1  | + |
| 1976 | <i>S. epidermidis</i> | 20  | 1  | 1  | 2  | 2 | 1  | 1 | 3  | - |
| 1979 | <i>S. epidermidis</i> | 16  | 2  | 1  | 2  | 2 | 15 | 1 | 1  | + |
| 1988 | <i>S. epidermidis</i> | 179 | 1  | 2  | 2  | 2 | 1  | 1 | 1  | - |
| 1991 | <i>S. epidermidis</i> | 23  | 7  | 1  | 2  | 1 | 3  | 3 | 1  | - |
| 2007 | <i>S. epidermidis</i> | 184 | 16 | 1  | 2  | 1 | 2  | 1 | 1  | - |
| 2010 | <i>S. epidermidis</i> | 130 | 1  | 1  | 1  | 2 | 1  | 1 | 1  | + |
| 2012 | <i>S. epidermidis</i> | 16  | 2  | 1  | 2  | 2 | 15 | 1 | 1  | + |
| 2013 | <i>S. epidermidis</i> | 5   | 1  | 1  | 1  | 2 | 2  | 1 | 1  | + |
| 2028 | <i>S. epidermidis</i> | 22  | 7  | 1  | 2  | 2 | 4  | 7 | 1  | - |
| 2034 | <i>S. epidermidis</i> | 69  | 1  | 18 | 6  | 2 | 2  | 1 | 1  | + |
| 2036 | <i>S. epidermidis</i> | 23  | 7  | 1  | 2  | 1 | 3  | 3 | 1  | - |
| 2037 | <i>S. epidermidis</i> | 2   | 7  | 1  | 2  | 2 | 4  | 1 | 1  | - |
| 2048 | <i>S. epidermidis</i> | 2   | 7  | 1  | 2  | 2 | 4  | 1 | 1  | - |
| 2049 | <i>S. epidermidis</i> | 5   | 1  | 1  | 1  | 2 | 2  | 1 | 1  | + |
| 2052 | <i>S. epidermidis</i> | 5   | 1  | 1  | 1  | 2 | 2  | 1 | 1  | - |
| 2055 | <i>S. epidermidis</i> | 175 | 26 | 1  | 1  | 1 | 2  | 1 | 1  | + |
| 2057 | <i>S. epidermidis</i> | 7   | 1  | 1  | 1  | 2 | 4  | 1 | 1  | + |
| 2058 | <i>S. epidermidis</i> | 5   | 1  | 1  | 1  | 2 | 2  | 1 | 1  | + |
| 2063 | <i>S. epidermidis</i> | 5   | 1  | 1  | 1  | 2 | 2  | 1 | 1  | + |
| 2066 | <i>S. epidermidis</i> | 16  | 2  | 1  | 2  | 2 | 15 | 1 | 1  | + |
| 2078 | <i>S. epidermidis</i> | 5   | 1  | 1  | 1  | 2 | 2  | 1 | 1  | - |
| 2079 | <i>S. epidermidis</i> | 2   | 7  | 1  | 2  | 2 | 4  | 1 | 1  | - |
| 2080 | <i>S. epidermidis</i> | 5   | 1  | 1  | 1  | 2 | 2  | 1 | 1  | - |
| 2081 | <i>S. epidermidis</i> | 83  | 1  | 2  | 1  | 2 | 1  | 1 | 10 | - |
| 2082 | <i>S. epidermidis</i> | 19  | 8  | 7  | 12 | 4 | 12 | 2 | 2  | - |
| 2084 | <i>S. epidermidis</i> | 176 | 3  | 1  | 24 | 5 | 7  | 4 | 11 | - |
| 2087 | <i>S. epidermidis</i> | 59  | 2  | 1  | 1  | 1 | 2  | 1 | 1  | - |
