# Supplementary material
Source: PubMed Central journal article supplement (PMC3493253)
Supplement: NIHMS413945-supplement-239_2012_9520_MOESM4_ESM.pdf [file NIHMS413945-supplement-239_2012_9520_MOESM4_ESM.pdf]

**Table S3** GenBank accession numbers for the exploratory genome-wide scan of *S. epidermidis*

| <b>Strain</b> | <b>Species</b>        | <b>ST</b>     | <b>Accession number</b> |
|---------------|-----------------------|---------------|-------------------------|
| ATCC12228     | <i>S. epidermidis</i> | 8             | NC_004461               |
| BCM-HMP0060   | <i>S. epidermidis</i> | 59            | NZ_ACHE00000000         |
| FRI909        | <i>S. epidermidis</i> | Novel         | AENR00000000            |
| M23864-W2     | <i>S. epidermidis</i> | 5             | NZ_ADMU00000000         |
| RP62A         | <i>S. epidermidis</i> | 10            | NC_002976               |
| SK135         | <i>S. epidermidis</i> | 57            | NZ_ADEY00000000         |
| VCU028        | <i>S. epidermidis</i> | 1             | AFEH01000000            |
| VCU037        | <i>S. epidermidis</i> | Variant of 5  | AFTY00000000            |
| VCU045        | <i>S. epidermidis</i> | 5             | AFEI00000000            |
| VCU105        | <i>S. epidermidis</i> | 73            | AFTZ00000000            |
| VCU107        | <i>S. epidermidis</i> | Variant of 59 | AFUA00000000            |
| VCU144        | <i>S. epidermidis</i> | Novel         | AFED00000000            |
| W23144        | <i>S. epidermidis</i> | 290           | NZ_ACJC00000000         |
| N315          | <i>S. aureus</i>      | 5             | NC_002745               |
