# Supplementary material
Source: PubMed Central journal article supplement (PMC3493253)
Supplement: NIHMS413945-supplement-239_2012_9520_MOESM5_ESM.pdf [file NIHMS413945-supplement-239_2012_9520_MOESM5_ESM.pdf]

**Table S4** Coordinates of top 1.3% of empirical genome-wide distributions of *D* and *Pi/K*

| Alignment Coordinates of Window |         | Strain RP62A Coordinates of Window |         | Observed | Observed    |                               |
|---------------------------------|---------|------------------------------------|---------|----------|-------------|-------------------------------|
| From                            | To      | From                               | To      | <i>D</i> | <i>Pi/K</i> | Comment                       |
| 175401                          | 175500  | 2145913                            | 2145814 | 2.184    | 0.131       |                               |
| 494001                          | 494100  | 1559829                            | 1559730 | 2.545    | 0.141       |                               |
| 494101                          | 494200  | 1559729                            | 1559038 | 2.671    | 0.367       |                               |
| 494201                          | 494300  | 1559037                            | 1558924 | 2.761    | 0.394       |                               |
| 494301                          | 494400  | 1558923                            | 1558822 | 2.718    | 0.322       |                               |
| 494401                          | 494500  | 1558821                            | 1558712 | 2.623    | 0.264       |                               |
| 494501                          | 494600  | 1558711                            | 1558610 | 2.709    | 0.376       |                               |
| 494601                          | 494700  | 1558609                            | 1558510 | 2.724    | 0.262       |                               |
| 494701                          | 494800  | 1558509                            | 1558410 | 2.153    | 0.209       |                               |
| 874501                          | 874600  | 1065218                            | 1065119 | 2.478    | 0.131       |                               |
| 876501                          | 876600  | 1063217                            | 1062573 | 2.222    | 0.124       |                               |
| 879901                          | 880000  | 1058236                            | 1058137 | 2.021    | 0.128       |                               |
| 883101                          | 883200  | 1055014                            | 1054915 | 2.222    | 0.126       |                               |
| 883401                          | 883500  | 1054714                            | 1054615 | 1.855    | 0.118       |                               |
| 898301                          | 898400  | 1002498                            | 1002397 | 1.661    | 0.110       |                               |
| 1045901                         | 1046000 | 829088                             | 828989  | 1.885    | 0.145       |                               |
| 1487801                         | 1487900 | 269996                             | 269897  | 2.335    | 0.118       |                               |
| 1488701                         | 1488800 | 269096                             | 268997  | 2.021    | 0.149       |                               |
| 1490801                         | 1490900 | 260030                             | 259931  | 2.335    | 0.135       |                               |
| 1491801                         | 1491900 | 259030                             | 258931  | 2.037    | 0.136       |                               |
| 1497501                         | 1497600 | 245638                             | 245539  | 2.459    | 0.133       |                               |
| 1499501                         | 1499600 | 243096                             | 242997  | 2.122    | 0.123       |                               |
| 1501701                         | 1501800 | 240579                             | 240480  | 2.478    | 0.151       |                               |
| 1515001                         | 1515100 | 214701                             | 214602  | 1.743    | 0.131       |                               |
| 1516701                         | 1516800 | 212877                             | 212778  | 1.890    | 0.227       |                               |
| 1524701                         | 1524800 | 194600                             | 194501  | 1.773    | 0.111       |                               |
| 1537001                         | 1537100 | 181649                             | 181550  | 1.661    | 0.198       |                               |
| 1573901                         | 1574000 | 2399033                            | 2399132 | 2.735    | 0.374       | arcD-like gene, peak window 1 |
| 1574001                         | 1574100 | 2399133                            | 2399232 | 1.982    | 0.168       |                               |
| 1574501                         | 1574600 | 2399633                            | 2399732 | 2.551    | 0.203       | arcD-like gene, peak window 2 |
| 1574701                         | 1574800 | 2399833                            | 2399932 | 1.674    | 0.224       | arcD-like gene, peak window 3 |
